# Supplementary material
Source: PubMed Central journal article supplement (PMC3135925)
Supplement: supp_pp.111.174425_174425Figure_S1_Clement_et_al.pdf [file supp_pp.111.174425_174425Figure_S1_Clement_et_al.pdf]

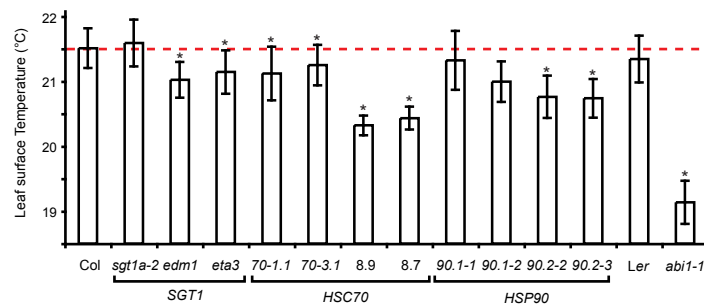

Supplemental Figure S1: Impact of SGT1b, HSC70-1 and HSP90 deregulation on average leaf surface temperature measured by thermal imaging. Values represent the average temperature at 10 locations on different 3 plants. Error bars indicate standard deviations. Asterisks represent values statistically different from wild-type control ( $p < 0,001$ , student's  $t$ -test).
