# Supplementary material
Source: PubMed Central journal article supplement (PMC3135925)
Supplement: supp_pp.111.174425_174425Figure_S2_Clement_et_al.pdf [file supp_pp.111.174425_174425Figure_S2_Clement_et_al.pdf]

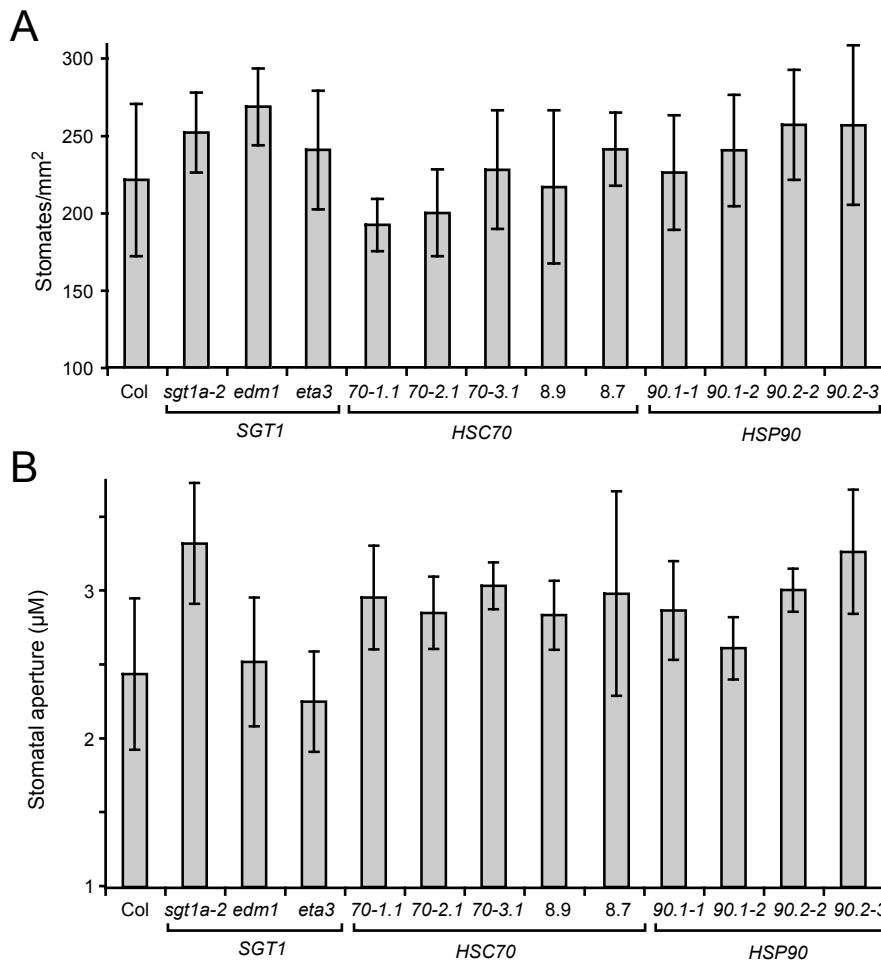

Supplemental Figure S2: Effect of SGT1, HSC70 and HSP90 on leaf stomatal density and aperture in the light. The same epidermal peels were used to generate Fig. 2B and Supplemental Fig. S1. (A) Average stomatal density was determined on at least three zones of each epidermal peel used in Fig. 2B and on at least 3 different plants per genotype. (B) Average stomatal aperture ( $\mu\text{M}$ ) was measured on epidermal peels incubated for 2 h in darkness and 2 h under light conditions. These data used for Fig. 2A permitted to express stomatal aperture as a percentage of stomatal aperture under light. Error bars indicate standard deviations. No statistically significant differences for values compared with wild type could be observed as determined by student's *t*-test ( $p < 0.05$ ).
