# Supplementary material
Source: PubMed Central journal article supplement (PMC3135925)
Supplement: supp_pp.111.174425_174425Figure_S3_Clement_et_al.pdf [file supp_pp.111.174425_174425Figure_S3_Clement_et_al.pdf]

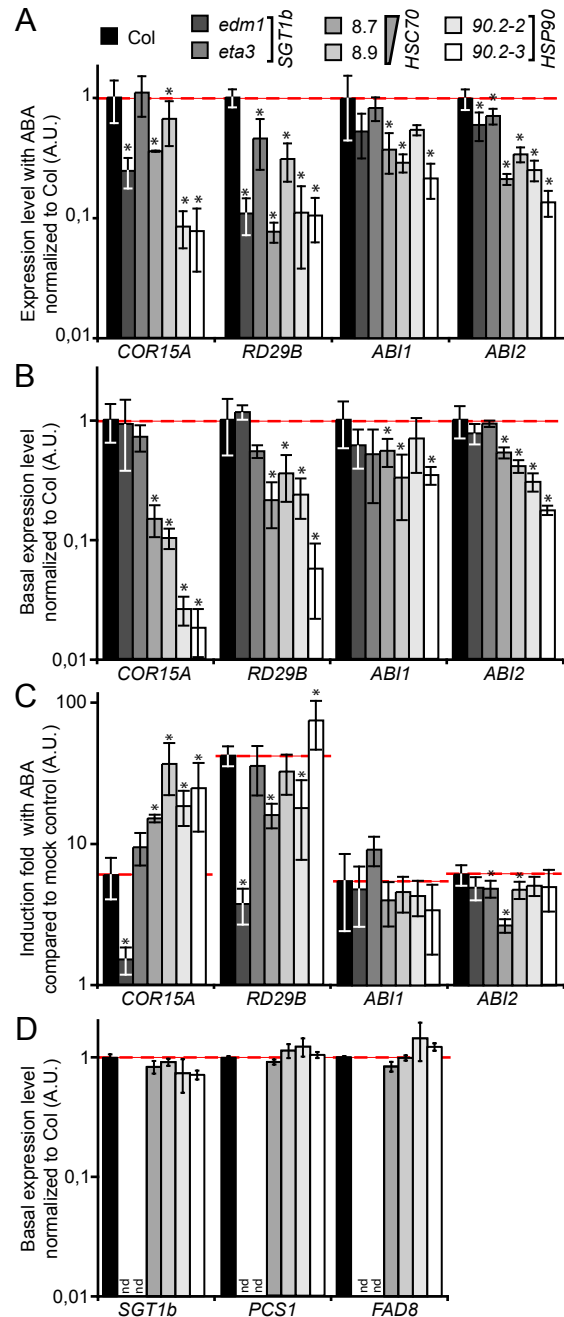

Supplemental Figure S3: Transcriptional responses to ABA in *sgt1* and *hsp90.2* DN mutants and HSC70-1 OE lines. cDNA was prepared from 10-day-old seedlings 3 h after a 10  $\mu$ M ABA or mock treatment and its abundance measured by quantitative RT-PCR. Relative cDNA abundance of the ABA-responsive genes *COR15A*, *RD29B*, *ABI1* and *ABI2* was expressed relative to ABA-treated Col control (A), relative to Col mock control (B) and as induction fold relative to mock control within each genotype (C). (D) Relative cDNA abundance of *SGT1b*, *PCS1* and *FAD8* was expressed relative to Col mock control. *Actin8* and *ROC3* expression was used to normalize the transcript levels. Three independent RT-PCR experiments were performed on three independent biological samples. The bars represent mean values from three independent experiments and error bars indicate standard deviations. \*, statistically significant differences for values as determined by student's *t*-test ( $p < 0.05$ ). nd, not determined.
