# Supplementary material
Source: PubMed Central journal article supplement (PMC3135925)
Supplement: supp_pp.111.174425_174425Table_S1.pdf [file supp_pp.111.174425_174425Table_S1.pdf]

Table S1: Oligonucleotide primers used for real-time RT-PCR analysis

| Gene Name      | AGI code  | Primer 1                     | Primer 2                      |
|----------------|-----------|------------------------------|-------------------------------|
| <i>ACT8</i>    | At1g49240 | 5'-CGCTCTCGCTCTTACCTGAG-3'   | 5'- TCCGAGTTTGAAGAGGCTACA-3'  |
| <i>ROC3</i>    | At2g16600 | 5'-TCGGTGAAAGCTTGATCCTT-3'   | 5'-ATCGTGATGGAGCTTTACGC-3'    |
| <i>SGT1a</i>   | At4g23570 | 5'-AAGAGTATCGGACTGCTAAA-3'   | 5'-GCTGTAGGGGTGACAT-3'        |
| <i>SGT1b</i>   | At4g11260 | 5'-GTACCTAAGGAGAACGTAAC-3'   | 5'-AGGCCCAGGTGATTAT-3'        |
| <i>HSC70-1</i> | At5g02500 | 5'-TCTATTGAGCAGGCGAT-3'      | 5'-TCTATTGAGCAGGCGAT-3'       |
| <i>HSC70-2</i> | At5g02490 | 5'-CACCCGTGCTAGATTCG-3'      | 5'-GGATCGCAGCCTGAAC-3'        |
| <i>HSC70-3</i> | At3g09440 | 5'-CGTCAGGTCACTAAGGAT-3'     | 5'-CTCGGGTTTCCACTAATGT-3'     |
| <i>HSC70-4</i> | At3g12580 | 5'-TGGGCCTGATATGGGT-3'       | 5'-AGGTCAGAGCGAGTTT-3'        |
| <i>HSC70-5</i> | At1g16030 | 5'-TGAGACAGCAGGRGGG-3'       | 5'-CACCAGCGGTTTTATCC-3'       |
| <i>HSP90.1</i> | At5g52640 | 5'-CAGCTTTGTTGACGTCTGGA-3'   | 5'-TCGACTTCCTCCATCTTGCT-3'    |
| <i>HSP90.2</i> | At5g56030 | 5'-TGATGAGCCAAACACTTTCG-3'   | 5'-TCGACTTCCTCCATCTTGCT-3'    |
| <i>HSP90.3</i> | At5g56010 | 5'-GCTGATGCAGACAAGAACGA-3'   | 5'-CTTCAAGTGGAGGCATGTCA-3'    |
| <i>HSP90.4</i> | At5g56000 | 5'-CCTTGATGAGCCAAACACTT-3'   | 5'-TCGACTTCCTCCATCTTGCT-3'    |
| <i>HSP90.5</i> | At2g04030 | 5'-CGCTGCTTGTAAGAATGCAC-3'   | 5'-CCTCTGTTTCTCCGCTTTTG-3'    |
| <i>ABI1</i>    | At4g26080 | 5'-GAGGCAGAGAGGGTCCTTTT-3'   | 5'-AGCCCGGAAGAAAAATACA-3'     |
| <i>ABI2</i>    | At5g57050 | 5'-AAGATCCTGCAGCAATGTCC-3'   | 5'-TCCCTTCAAATCAACCACTACC-3'  |
| <i>COR15A</i>  | At2g42540 | 5'-GAGGGTAAAGCAGGAGAGG-3'    | 5'-ATGAAGAGAGAGGATATGGATCA-3' |
| <i>RD29A</i>   | At5g52310 | 5'- CTTGGCTCCACTGTTGTTCC -3' | 5'-CATCAAAGACGTCAAACAAAACA-3' |
| <i>RD29B</i>   | At5g52300 | 5'-CACCAACCGTTGGGACTATG-3'   | 5'-GCAAAACCCCAAATCTTCAG-3'    |
| <i>RAB18</i>   | At5g66400 | 5'-GCCGTTAAGCTTCGAACAAT-3'   | 5'-AAACAACACACATCGCAGGA-3'    |
| <i>FAD8</i>    | At5g05580 | 5'-CTTTGTCATGGGTCCAATCC-3'   | 5'-TGAGCCCTCCTCTCAGGTAA-3'    |
| <i>PCS1</i>    | At5g44070 | 5'-TCGACGCAAACACTGAGTG-3'    | 5'-AGCAGCGAGATCATCC-3'        |
